# Supplementary material for: Aged Lens Epithelial Cells Suppress Proliferation and Epithelial–Mesenchymal Transition-Relevance for Posterior Capsule Opacification
Source: MDPI journal article supplement (doi:10.3390/cells11132001), 2022-06-22

**Table S1.** Common and distinct genes in human FHL124 LECs vs. three mouse lens epithelium in their top 500 most expressed genes

| Common Genes List                                                                                                 |         |         | Distinct Genes List                                                                                                |         |         |
|-------------------------------------------------------------------------------------------------------------------|---------|---------|--------------------------------------------------------------------------------------------------------------------|---------|---------|
| 179 of 254 shared genes in 3 independently reported mouse lens epithelium are also FHL124 top 500 expressed genes |         |         | 75 of 254 shared genes in 3 independently reported mouse lens epithelium are not in FHL124 top 500 expressed genes |         |         |
| ACTB                                                                                                              | MORF4L1 | RPL38   | AKR1A1                                                                                                             | CST3    | NID1    |
| ACTG1                                                                                                             | MRFAP1  | RPL39   | ALDH1A1                                                                                                            | CTSD    | NREP    |
| ALDOA                                                                                                             | MT-ATP6 | RPL4    | ARGLU1                                                                                                             | CTSL    | ODC1    |
| ANXA1                                                                                                             | MT-ATP8 | RPL41   | ARHGDIA                                                                                                            | DKK3    | PGK1    |
| APP                                                                                                               | MT-CO1  | RPL6    | ASS1                                                                                                               | EEF1B2  | PMP22   |
| ARF1                                                                                                              | MT-CO2  | RPL7    | ATP1B3                                                                                                             | FOXE3   | R3HDML  |
| ATP1A1                                                                                                            | MT-CO3  | RPL7A   | ATP6V0C                                                                                                            | GJA3    | RPL23A  |
| ATP5A1                                                                                                            | MT-ND1  | RPL8    | BC1                                                                                                                | GJA8    | RPL36   |
| ATP5B                                                                                                             | MT-ND2  | RPL9    | BTG1                                                                                                               | GNG5    | RPL36A  |
| BSG                                                                                                               | MT-ND3  | RPLP0   | CADM1                                                                                                              | GRIFIN  | RPS25   |
| BTF3                                                                                                              | MT-ND4  | RPLP1   | CD81                                                                                                               | GSTM1   | RPS26   |
| CALM2                                                                                                             | MT-ND4L | RPS11   | CDH1                                                                                                               | H3F3A   | RPS28   |
| CALM3                                                                                                             | MT-ND5  | RPS12   | CLU                                                                                                                | HIF1A   | SELENOW |
| CALR                                                                                                              | MT-ND6  | RPS13   | COX4I1                                                                                                             | IGFBP7  | SFRP1   |
| CANX                                                                                                              | MT-RNR1 | RPS14   | COX6C                                                                                                              | ITM2B   | SKP1A   |
| CCT2                                                                                                              | MT-RNR2 | RPS15   | COX8A                                                                                                              | LIX1    | SLC25A4 |
| CCT5                                                                                                              | NACA    | RPS15A  | CPE                                                                                                                | MAGED1  | SLC2A1  |
| CD63                                                                                                              | NPM1    | RPS16   | CRYAA                                                                                                              | MGARP   | SLC7A8  |
| CDH2                                                                                                              | OAZ1    | RPS17   | CRYAB                                                                                                              | MIF     | TMEM59  |
| CFL1                                                                                                              | P4HB    | RPS18   | CRYBA1                                                                                                             | MIP     | TUBB5   |
| CHCHD2                                                                                                            | PABPC1  | RPS19   | CRYBA2                                                                                                             | MRFAP1  | UBB     |
| CNN3                                                                                                              | PDIA3   | RPS2    | CRYBA4                                                                                                             | MT-CYTB | UQCRH   |
| COL4A1                                                                                                            | PEBP1   | RPS20   | CRYBB1                                                                                                             | NAP1L1  | VIT     |
| COL4A2                                                                                                            | PFN1    | RPS21   | CRYBB3                                                                                                             | NDUFA1  | SOD1    |
| COTL1                                                                                                             | PGAM1   | RPS23   | CRYGS                                                                                                              | NEDD4   | SPON1   |
| CRIM1                                                                                                             | PHGDH   | RPS24   |                                                                                                                    |         |         |
| DDOST                                                                                                             | PKM     | RPS27A  |                                                                                                                    |         |         |
| DDX5                                                                                                              | PPIA    | RPS29   |                                                                                                                    |         |         |
| DSTN                                                                                                              | PPIB    | RPS3    |                                                                                                                    |         |         |
| EEF1A1                                                                                                            | PSAP    | RPS3A   |                                                                                                                    |         |         |
| EEF1G                                                                                                             | PTMA    | RPS4X   |                                                                                                                    |         |         |
| EEF2                                                                                                              | PTMS    | RPS5    |                                                                                                                    |         |         |
| EIF1                                                                                                              | PXDN    | RPS6    |                                                                                                                    |         |         |
| EIF4A1                                                                                                            | RAC1    | RPS7P1  |                                                                                                                    |         |         |
| EIF4B                                                                                                             | RCN1    | RPS8    |                                                                                                                    |         |         |
| EIF4G2                                                                                                            | RPL10   | RPS9    |                                                                                                                    |         |         |
| EIF5A                                                                                                             | RPL11   | RPSA    |                                                                                                                    |         |         |
| ENO1                                                                                                              | RPL13   | SCD     |                                                                                                                    |         |         |
| EZR                                                                                                               | RPL13A  | SERF2   |                                                                                                                    |         |         |
| FSTL1                                                                                                             | RPL14   | SLC25A3 |                                                                                                                    |         |         |
| FTH1                                                                                                              | RPL18   | SLC25A5 |                                                                                                                    |         |         |
| FTL                                                                                                               | RPL18A  | SLC38A2 |                                                                                                                    |         |         |
| GAPDH                                                                                                             | RPL19   | SLC3A2  |                                                                                                                    |         |         |
| GJA1                                                                                                              | RPL22   | SLC7A5  |                                                                                                                    |         |         |
| GNAS                                                                                                              | RPL23   | SPARC   |                                                                                                                    |         |         |
| H3F3B                                                                                                             | RPL24   | SSR3    |                                                                                                                    |         |         |
| HMG2                                                                                                              | RPL26   | STMN1   |                                                                                                                    |         |         |
| HNRNPA1                                                                                                           | RPL27   | TKT     |                                                                                                                    |         |         |
| HNRNPA2B1                                                                                                         | RPL27A  | TMBIM6  |                                                                                                                    |         |         |
| HNRNPU                                                                                                            | RPL28   | TMSB10  |                                                                                                                    |         |         |
| HSP90AA1                                                                                                          | RPL29   | TMSB4X  |                                                                                                                    |         |         |
| HSP90AB1                                                                                                          | RPL3    | TPT1    |                                                                                                                    |         |         |
| HSP90B1                                                                                                           | RPL30   | TUBA1A  |                                                                                                                    |         |         |
| HSPA5                                                                                                             | RPL31   | TUBA1B  |                                                                                                                    |         |         |
| HSPA8                                                                                                             | RPL32   | UBB     |                                                                                                                    |         |         |
| HSPG2                                                                                                             | RPL34   | VIM     |                                                                                                                    |         |         |
| ITGB1                                                                                                             | RPL35   | YBX1    |                                                                                                                    |         |         |
| LDHA                                                                                                              | RPL35A  | YWHAE   |                                                                                                                    |         |         |
| MALAT1                                                                                                            | RPL37   | YWHAQ   |                                                                                                                    |         |         |
|                                                                                                                   | RPL37A  | YWHAZ   |                                                                                                                    |         |         |

**Figure S1**

**A**

**P42 vs. P15**

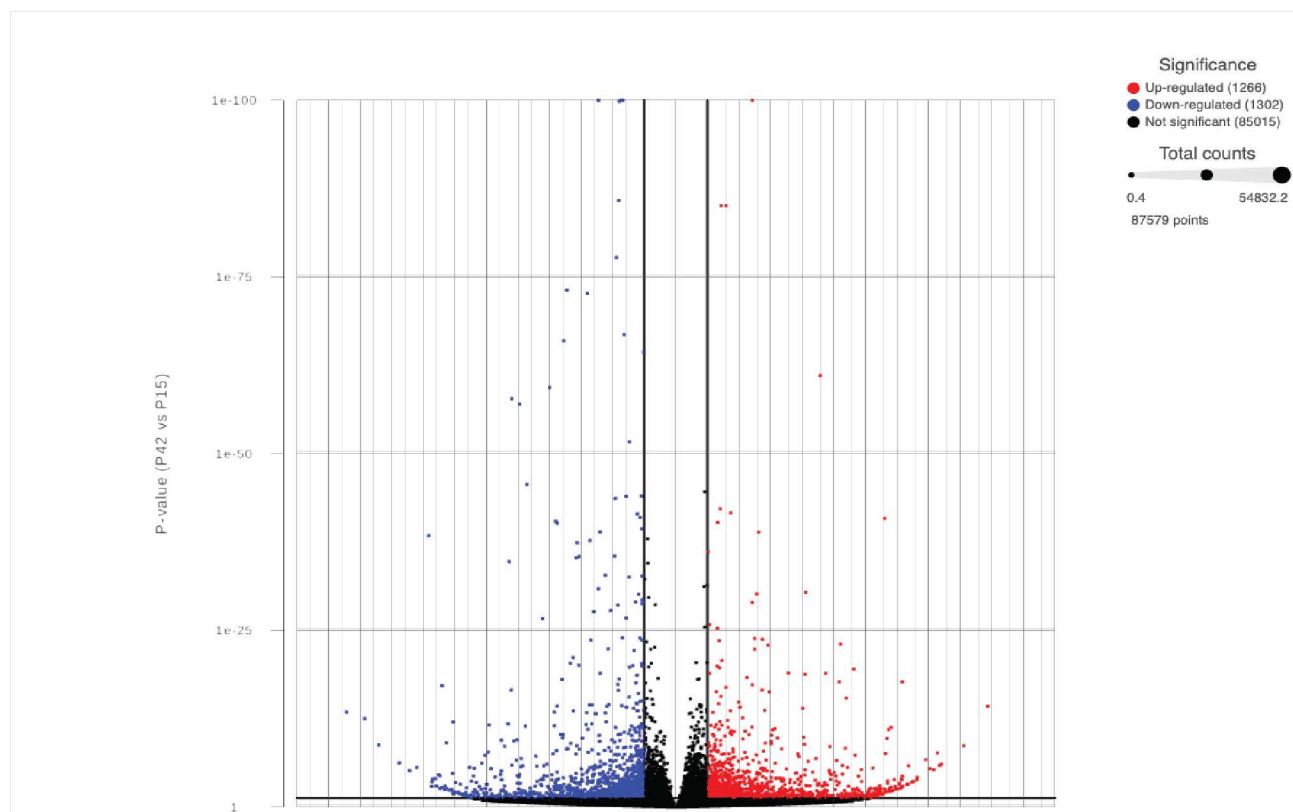

**Volcano Plot**

**B**

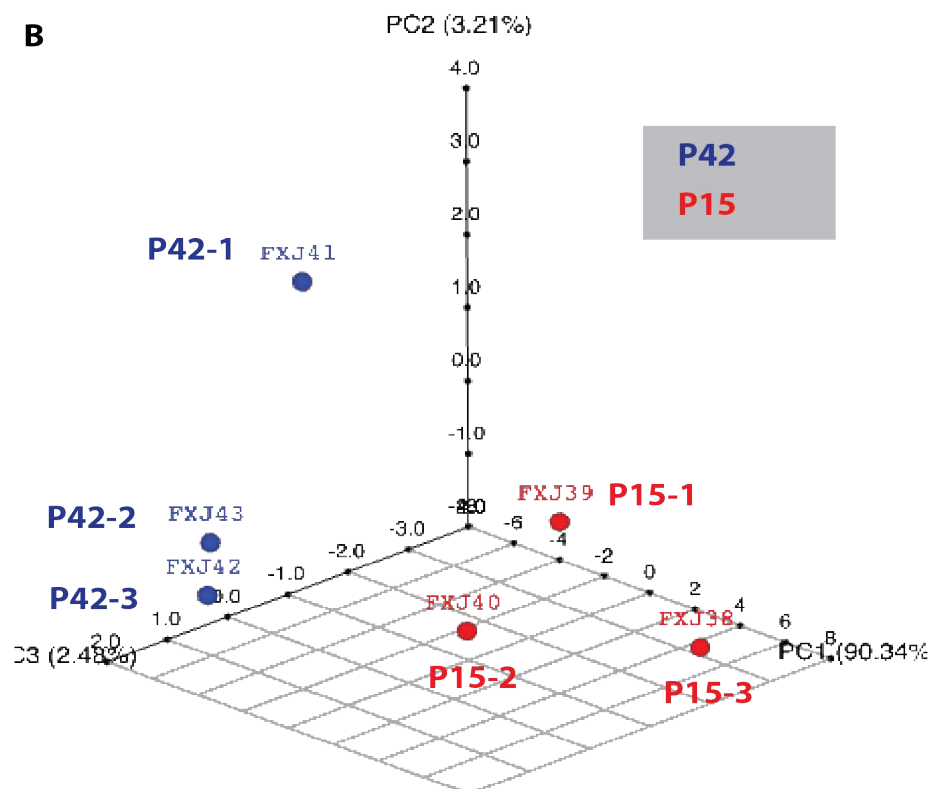

**Principal Component Analysis (PCA)**

**Figure S1.** RNAseq data analysis summary. (A) volcano plot comparing P42 to P15 FHL124 cells. (B) Principal component analysis (PCA).

### Cell Senescence Related Genes (Positive Association)

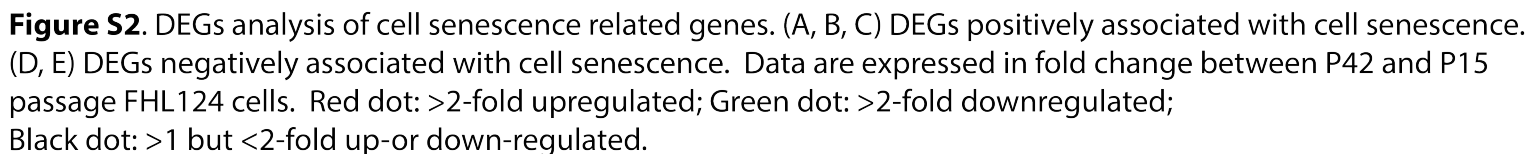

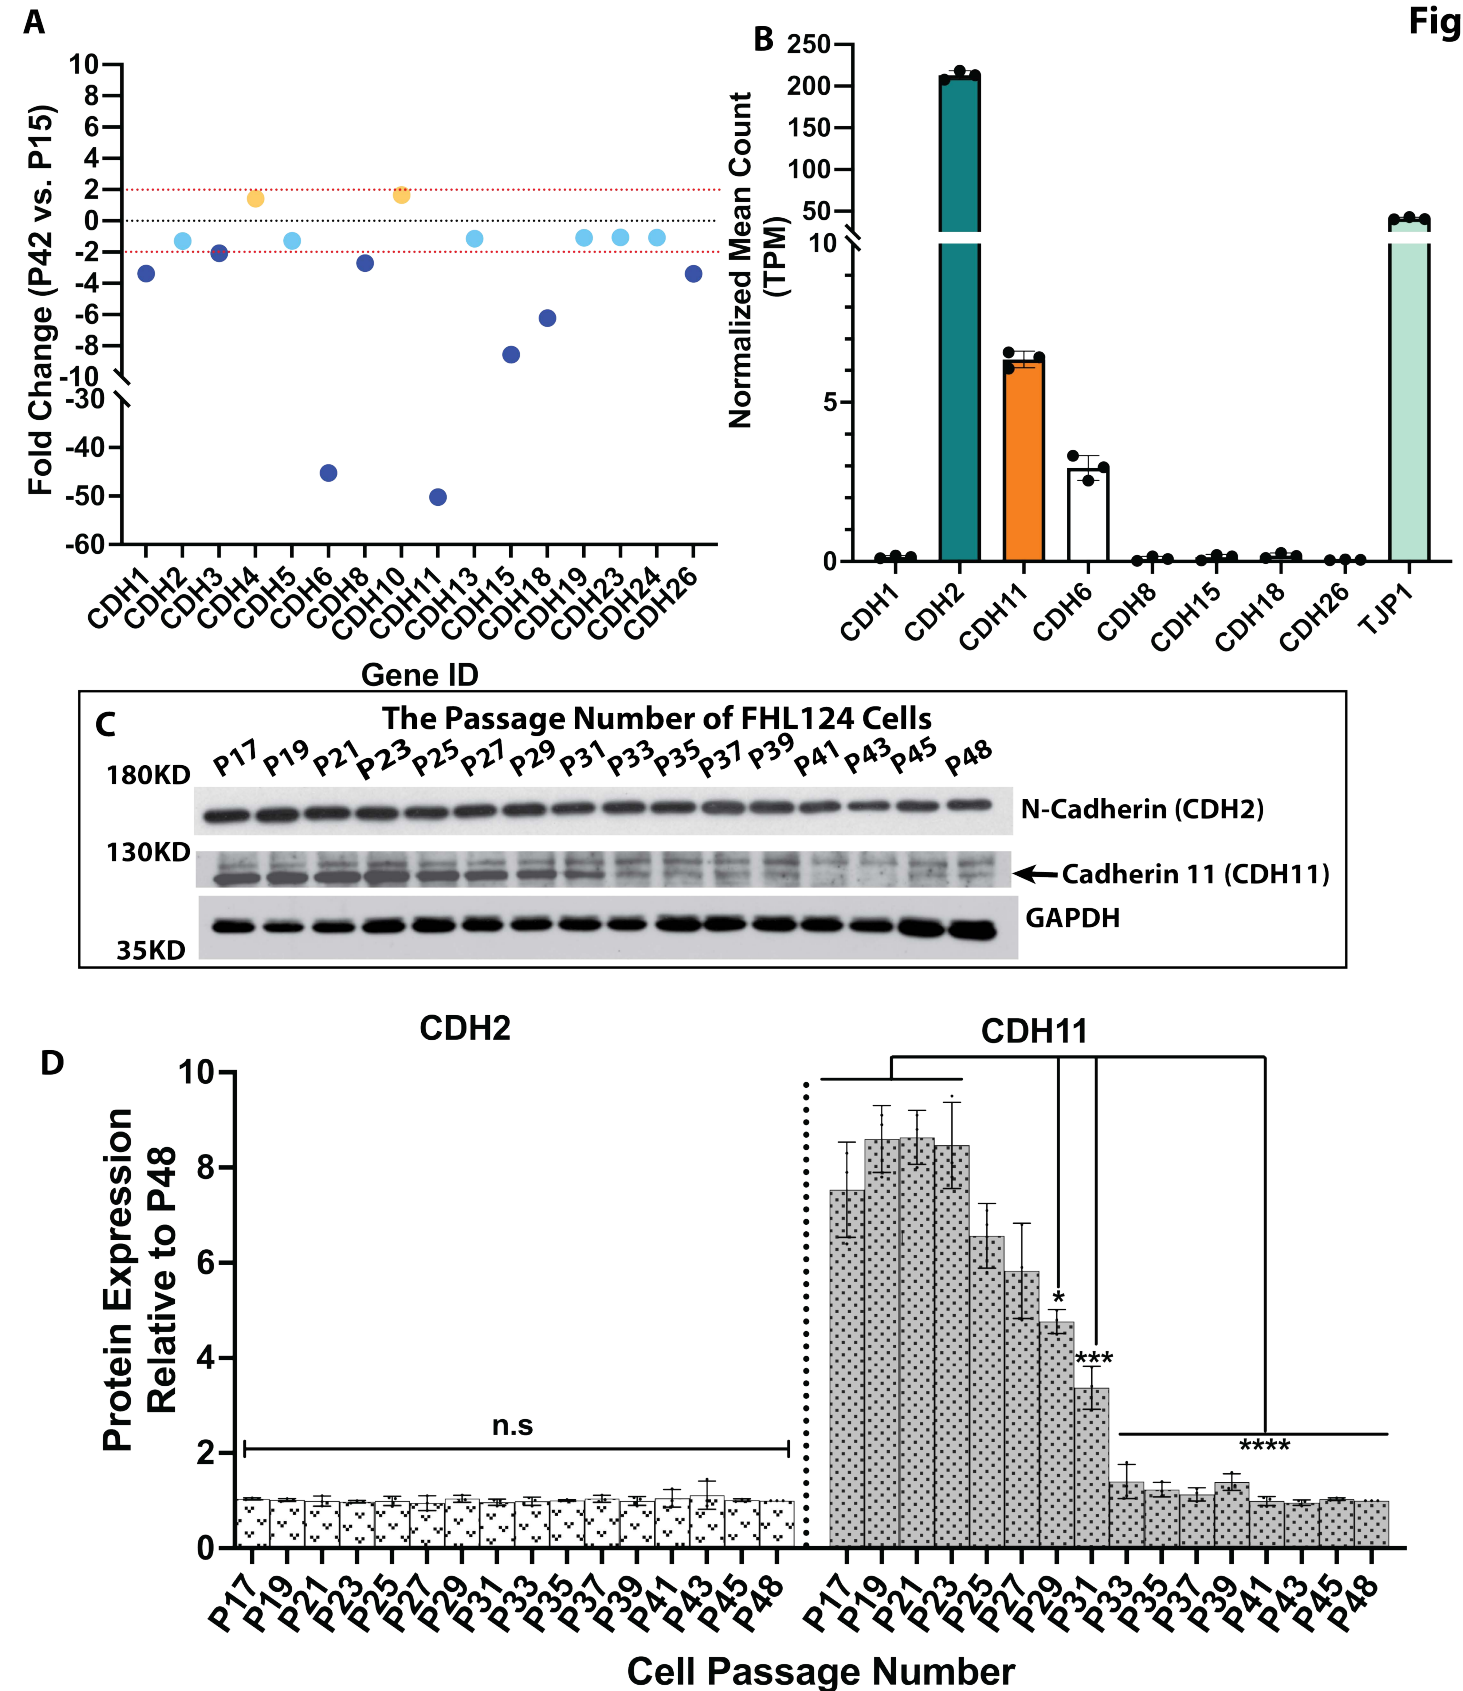

**Figure S3.** Cadherin 11 (CDH11) is an EMT marker for LECs. (A) RNAseq data of cell adhesion cadherin family molecules. Data are expressed as fold change of P42 vs. P15 passage FHL124 cells. Dark blue dot: >2-fold downregulated; light blue dot: >1 but <2-fold downregulated; orange dot: >1 but <2-fold upregulated. (B) The relative mRNA levels of selected cadherin genes are measured by normalized mean count of transcripts per million (TPM). ZO-1 (TJP1) serves as a reference cell junction gene. (C) N-cadherin and CDH11 protein expression determined by immunoblot. GAPDH serves as a loading control. (D) Semi-quantitative results of N-cadherin and CDH11 protein levels in FHL124 cells at various passages. Results are expressed as mean  $\pm$  SD and were analyzed using one-way ANOVA with Tukey's multiple comparisons test. Only  $p < 0.05$  is considered significant. \* $p < 0.05$ , \*\* $p < 0.01$ , \*\*\* $p < 0.001$ , \*\*\*\* $p < 0.0001$ , n.s, not significant.

**Figure S4**

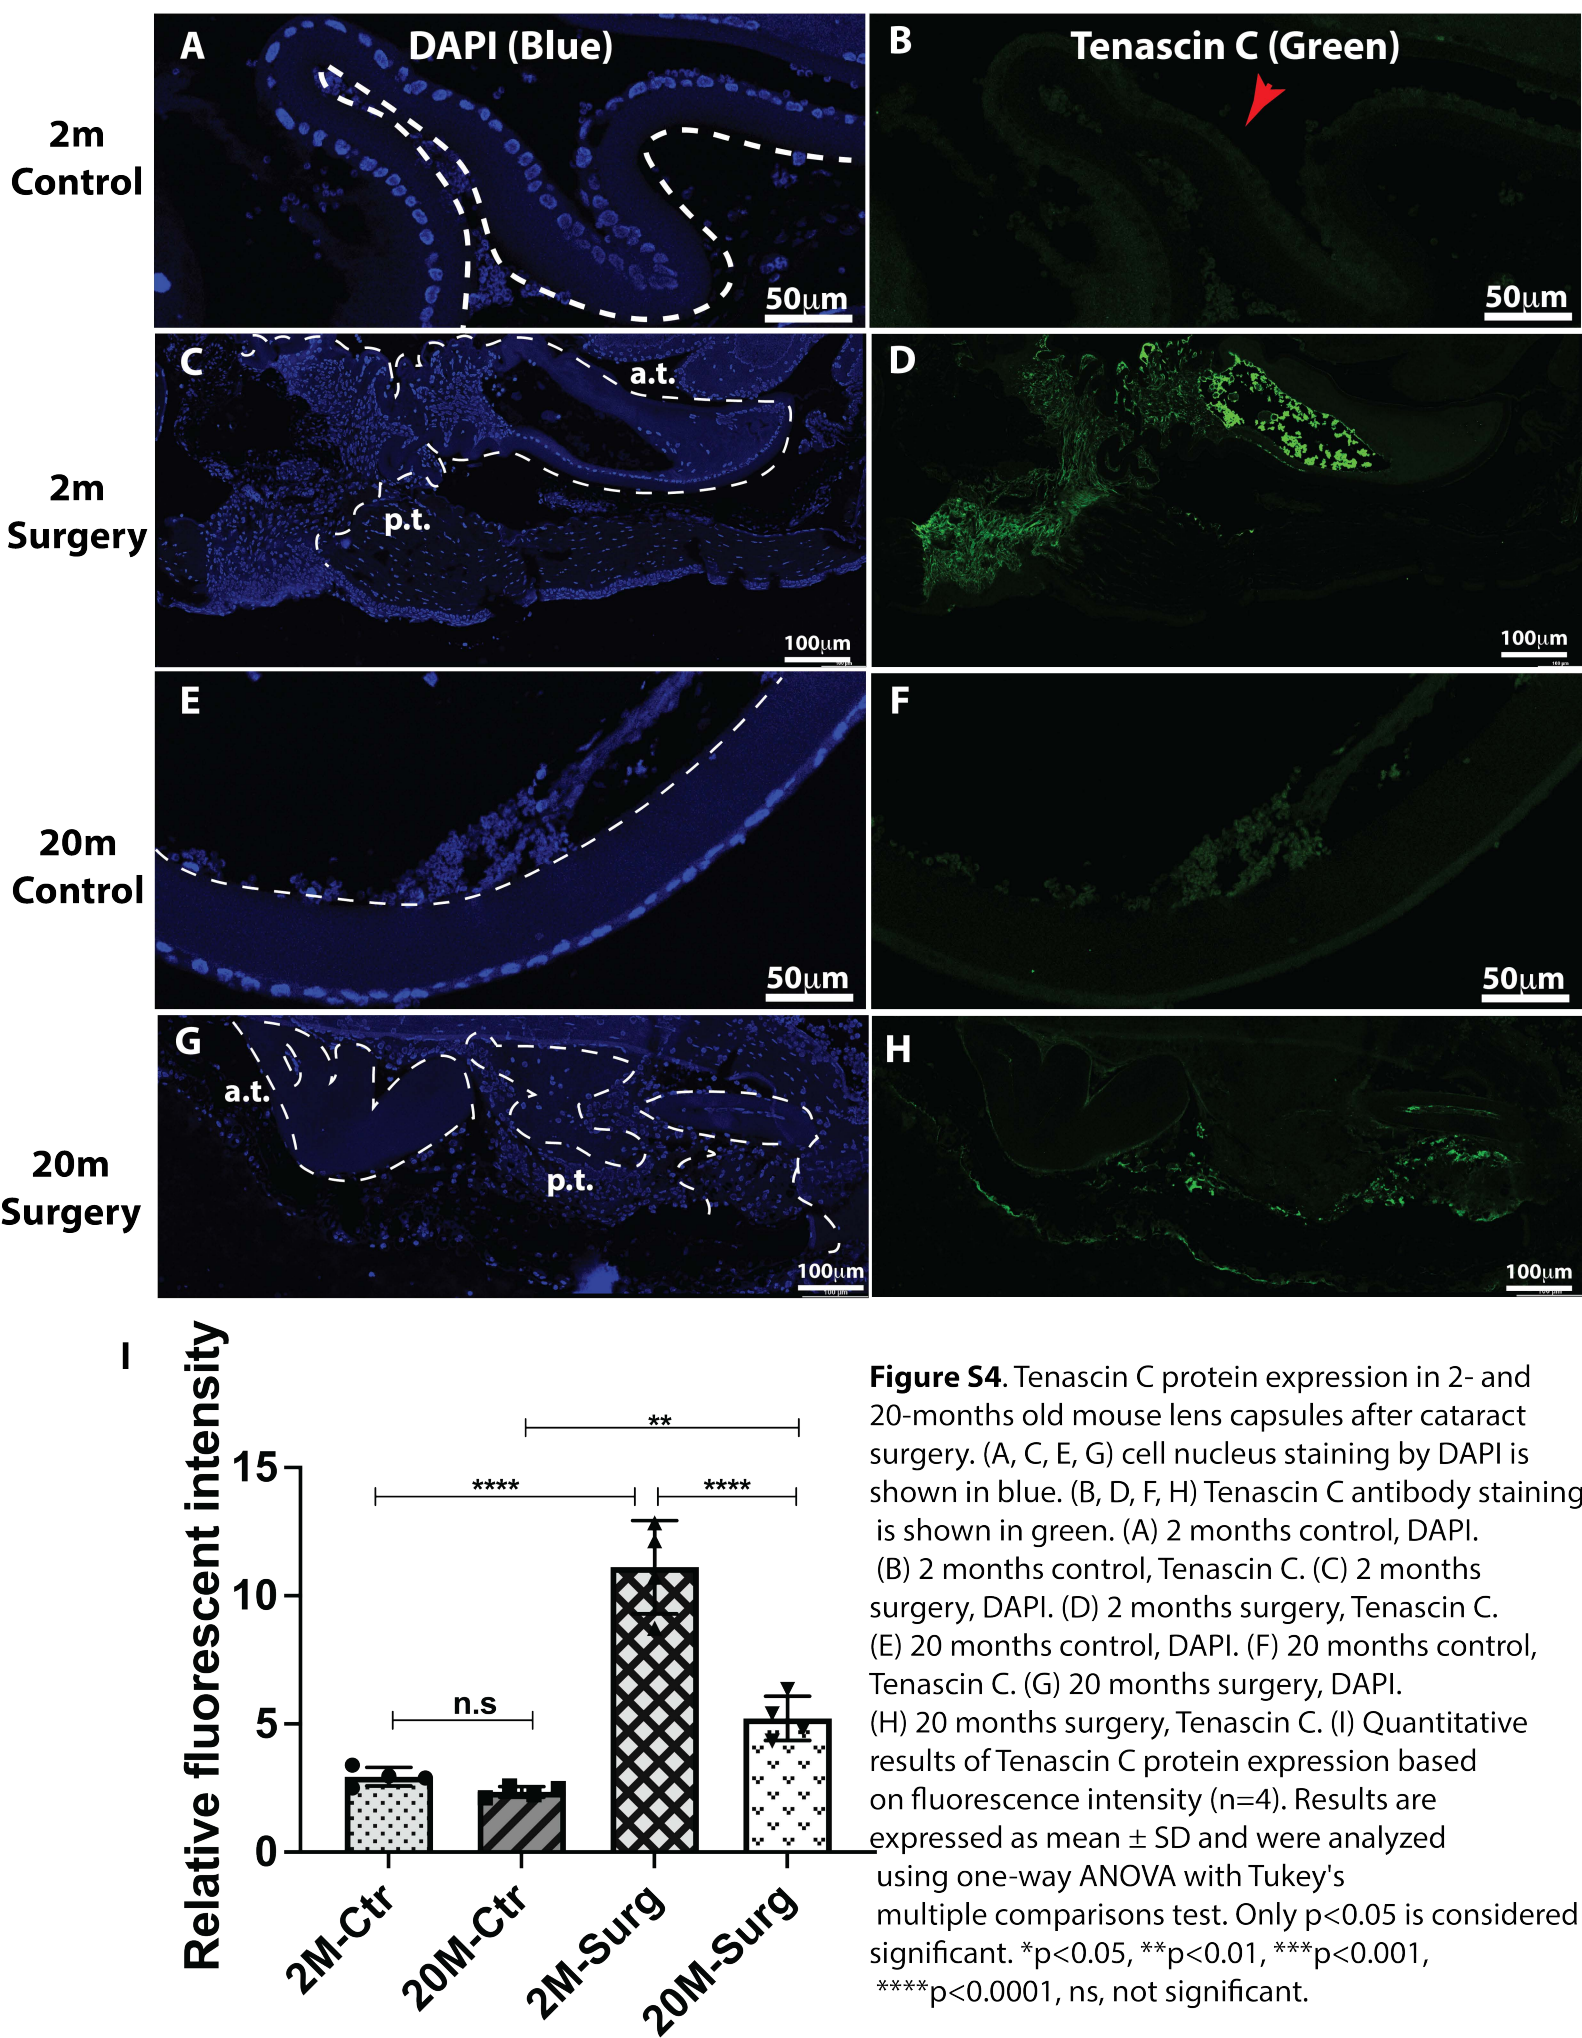

Supplement: s1 [file s1]
